# Supplementary material for: Genes Related to Mitochondrial Functions, Protein Degradation, and Chromatin Folding Are Differentially Expressed in Lymphomonocytes of Rett Syndrome Patients
Source: PubMed Central journal article supplement (PMC3876710; doi:10.1155/2013/137629), 2013-12-12
Supplement: 137629.f1.pdf [file 137629.f1.pdf]

**Table 1S.** List of all genes resulted up-regulated in RTT vs controls by LIMMA and SAM analyses.

| NCBI Ref. Seq. | Gene symbol | Gene name                                                                                            | FC   |
|----------------|-------------|------------------------------------------------------------------------------------------------------|------|
| NM_001087.3    | AAMP        | Angio-associated, migratory cell protein                                                             | 1.07 |
| NM_181806.2    | AASDH       | Aminoadipate-semialdehyde dehydrogenase                                                              | 1.03 |
| NM_032169.4    | ACAD11      | Acyl-coa dehydrogenase family, member 11                                                             | 1.01 |
| NM_032360.3    | ACBD6       | Acyl-coa binding domain containing 6                                                                 | 1.08 |
| NM_022496.4    | ACTR6       | ARP6 actin-related protein 6 homolog (yeast)                                                         | 1.43 |
| XM_005268239.1 | ACYP1       | Acylphosphatase 1, erythrocyte (common) type                                                         | 1.47 |
| NM_000671.3    | ADH5        | Alcohol dehydrogenase 5 (class III), chi polypeptide                                                 | 1.50 |
| NM_018269.3    | ADI1        | Acireductone dioxygenase 1                                                                           | 1.32 |
| NM_000027.3    | AGA         | Aspartylglucosaminidase                                                                              | 1.40 |
| NM_006303.3    | AIMP2       | Aminoacyl trna synthetase complex-interacting multifunctional protein 2                              | 1.06 |
| NM_006066.3    | AKR1A1      | Aldo-keto reductase family 1, member A1 (aldehyde reductase)                                         | 1.23 |
| XM_005251800.1 | ALDH1A1     | Aldehyde dehydrogenase 1 family, member A1                                                           | 1.64 |
| NM_013338.4    | ALG5        | ALG5, dolichyl-phosphate beta-glucosyltransferase                                                    | 1.76 |
| NM_032306.3    | ALKBH7      | Alkb, alkylation repair homolog 7 (E. Coli)                                                          | 1.32 |
| NM_001008221.1 | AMY1A       | Amylase, alpha 1A (salivary)                                                                         | 1.20 |
| NM_000699.2    | AMY2A       | Amylase, alpha 2A (pancreatic)                                                                       | 1.50 |
| NM_020978.4    | AMY2B       | Amylase, alpha 2B (pancreatic)                                                                       | 1.87 |
| NM_016476.10   | ANAPC11     | Anaphase promoting complex subunit 11                                                                | 1.81 |
| NM_001097577.2 | ANG         | Angiogenin, ribonuclease, rnase A family, 5                                                          | 1.06 |
| NM_023039.4    | ANKRA2      | Ankyrin repeat, family A (RFXANK-like), 2                                                            | 1.08 |
| NR_026844.1    | ANKRD36BP1  | Ankyrin repeat domain 36B pseudogene 1                                                               | 1.47 |
| NM_021822.3    | APOBEC3G    | Apolipoprotein B mrna editing enzyme, catalytic polypeptide-like 3G                                  | 1.55 |
| NM_004311.3    | ARL3        | ADP-ribosylation factor-like 3                                                                       | 1.08 |
| NM_032852.3    | ATG4C       | Autophagy related 4C, cysteine peptidase                                                             | 1.17 |
| NM_025092.4    | ATHL1       | ATH1, acid trehalase-like 1 (yeast)                                                                  | 1.09 |
| NM_004046.5    | ATP5A1      | ATP synthase, H <sup>+</sup> transporting, mitochondrial F1 complex, alpha subunit 1, cardiac muscle | 1.07 |
| NR_002162.1    | ATP5EP2     | ATP synthase, H <sup>+</sup> transporting, mitochondrial F1 complex, epsilon subunit pseudogene 2    | 1.02 |
| NM_004889.3    | ATP5J2      | ATP synthase, H <sup>+</sup> transporting, mitochondrial Fo complex, subunit F2                      | 1.22 |
| NM_001697.2    | ATP5O       | ATP synthase, H <sup>+</sup> transporting, mitochondrial F1 complex, O subunit                       | 1.36 |
| NM_015994.3    | ATP6V1D     | Atpase, H <sup>+</sup> transporting, lysosomal 34kda, V1 subunit D                                   | 1.24 |
| NM_016311.4    | ATPIF1      | Atpase inhibitory factor 1                                                                           | 1.04 |
| NM_000712.3    | BLVRA       | Biliverdin reductase A                                                                               | 1.33 |
| NM_015379.4    | BRI3        | Brain protein I3                                                                                     | 1.23 |
| NM_018462.4    | BRK1        | BRICK1, SCAR/WAVE actin-nucleating complex subunit                                                   | 1.14 |
| NM_015415.3    | BRP44       | Mitochondrial pyruvate carrier 2                                                                     | 1.08 |
| NM_004335.3    | BST2        | Bone marrow stromal cell antigen 2                                                                   | 1.35 |
| NM_003910.3    | BUD31       | BUD31 homolog (S. Cerevisiae)                                                                        | 1.54 |
| NM_144591.3    | C10orf32    | Chromosome 10 open reading frame 32                                                                  | 1.85 |
| NM_014206.3    | C11orf10    | Transmembrane protein 258                                                                            | 2.10 |
| NM_170746.2    | C11orf31    | Chromosome 11 open reading frame 31                                                                  | 1.14 |
| NM_020179.2    | C11orf75    | Single-pass membrane protein with coiled-coil domains 4                                              | 1.93 |
| NM_032230.2    | C12orf26    | Methyltransferase like 25                                                                            | 1.19 |
| NR_015404.1    | C12orf47    | MAPKAPK5 antisense RNA 1                                                                             | 2.22 |
| NM_138425.2    | C12orf57    | Chromosome 12 open reading frame 57                                                                  | 1.49 |
| NM_001145199.1 | C12orf75    | Chromosome 12 open reading frame 75                                                                  | 1.01 |

|                |              |                                                                         |      |
|----------------|--------------|-------------------------------------------------------------------------|------|
| NM_016039.2    | C14orf166    | Chromosome 14 open reading frame 166                                    | 1.59 |
| NM_001127393.1 | C14orf2      | Chromosome 14 open reading frame 2                                      | 1.37 |
| NM_020233.4    | C17orf48     | ADP-ribose/CDP-alcohol diphosphatase, manganese-dependent               | 1.20 |
| NR_027160.1    | C17orf76-AS1 | C17orf76 antisense RNA 1                                                | 1.01 |
| NM_001012985.2 | C1orf31      | Cytochrome c oxidase assembly factor 6 homolog ( <i>S. Cerevisiae</i> ) | 1.43 |
| NM_024579.3    | C1orf54      | Chromosome 1 open reading frame 54                                      | 1.69 |
| NM_020317.3    | C1orf63      | Chromosome 1 open reading frame 63                                      | 1.04 |
| NM_033318.4    | C22orf32     | Single-pass membrane protein with aspartate-rich tail 1                 | 2.02 |
| NM_001124767.1 | C3orf78      | Small integral membrane protein 4                                       | 2.09 |
| NM_017867.2    | C4orf27      | Chromosome 4 open reading frame 27                                      | 1.56 |
| NM_001145432.1 | C4orf52      | Small integral membrane protein 20                                      | 1.73 |
| NM_022483.4    | C5orf28      | Chromosome 5 open reading frame 28                                      | 1.02 |
| NM_001014279.2 | C5orf39      | Annexin A2 receptor                                                     | 1.75 |
| NM_024941.3    | C5orf44      | Trafficking protein particle complex 13                                 | 1.14 |
| NM_021243.2    | C6orf115     | ABRA C-terminal like                                                    | 1.35 |
| NM_001008739.1 | C6orf226     | Chromosome 6 open reading frame 226                                     | 1.19 |
| NM_001040437.1 | C6orf48      | Chromosome 6 open reading frame 48                                      | 2.73 |
| NM_018341.2    | C6orf70      | ER membrane-associated RNA degradation                                  | 1.04 |
| NM_001008395.2 | C7orf59      | Late endosomal/lysosomal adaptor, MAPK and MTOR activator 4             | 1.84 |
| NM_138436.3    | C8orf40      | Small integral membrane protein 19                                      | 1.49 |
| NM_018465.3    | C9orf46      | Plasminogen receptor, C-terminal lysine transmembrane protein           | 1.42 |
| NM_001743.4    | CALM2        | Calmodulin 2 (phosphorylase kinase, delta)                              | 1.40 |
| NM_001745.3    | CAMLG        | Calcium modulating ligand                                               | 1.30 |
| NM_001747.3    | CAPG         | Capping protein (actin filament), gelsolin-like                         | 1.18 |
| NM_001752.3    | CAT          | Catalase                                                                | 1.14 |
| NM_018491.3    | CBWD1        | COBW domain containing 1                                                | 1.21 |
| NM_201453.2    | CBWD3        | COBW domain containing 3                                                | 1.30 |
| XM_005272748.1 | CBWD5        | COBW domain containing 5                                                | 1.69 |
| NM_138493.2    | CCDC167      | Coiled-coil domain containing 167                                       | 1.54 |
| NM_199342.3    | CCDC23       | Coiled-coil domain containing 23                                        | 1.14 |
| NM_015439.2    | CCDC28A      | Coiled-coil domain containing 28A                                       | 1.02 |
| NM_001017928.2 | CCDC58       | Coiled-coil domain containing 58                                        | 1.09 |
| NM_015933.3    | CCDC72       | Translation machinery associated 7 homolog ( <i>S. Cerevisiae</i> )     | 1.69 |
| NM_002984.2    | CCL4         | Chemokine (C-C motif) ligand 4                                          | 2.15 |
| NM_001001435.2 | CCL4L1       | Chemokine (C-C motif) ligand 4-like 1                                   | 1.03 |
| NM_021178.4    | CCNB1IP1     | Cyclin B1 interacting protein 1, E3 ubiquitin protein ligase            | 1.13 |
| XM_005264083.1 | CCT4         | Chaperonin containing TCP1, subunit 4 (delta)                           | 1.17 |
| NM_001762.3    | CCT6A        | Chaperonin containing TCP1, subunit 6A (zeta 1)                         | 1.07 |
| NM_004244.5    | CD163        | CD163 molecule                                                          | 1.57 |
| NM_001765.2    | CD1C         | CD1c molecule                                                           | 1.84 |
| NM_001242.4    | CD27         | CD27 molecule                                                           | 1.04 |
| NM_000732.4    | CD3D         | CD3d molecule, delta (CD3-TCR complex)                                  | 1.83 |
| XM_005269238.1 | CD63         | CD63 molecule                                                           | 1.50 |
| NM_001783.3    | CD79A        | CD79a molecule, immunoglobulin-associated alpha                         | 1.51 |
| XM_005257858.1 | CD79B        | CD79b molecule, immunoglobulin-associated beta                          | 1.13 |
| NM_176096.2    | CDK5RAP3     | CDK5 regulatory subunit associated protein 3                            | 1.04 |
| XM_005266966.1 | CENPW        | Centromere protein W                                                    | 1.36 |
| NM_006324.2    | CFDP1        | Craniofacial development protein 1                                      | 1.01 |
| XM_058325.3    | CHCHD1       | Coiled-coil-helix-coiled-coil-helix domain containing 1                 | 1.71 |
| NM_016139.2    | CHCHD2       | Coiled-coil-helix-coiled-coil-helix domain containing 2                 | 1.25 |

|                |              |                                                              |      |
|----------------|--------------|--------------------------------------------------------------|------|
| NM_001280.2    | CIRBP        | Cold inducible RNA binding protein                           | 1.48 |
| NM_001828.5    | CLC          | Charcot-Leyden crystal galectin                              | 2.38 |
| NM_006344.2    | CLEC10A      | C-type lectin domain family 10, member A                     | 1.19 |
| NM_138337.5    | CLEC12A      | C-type lectin domain family 12, member A                     | 1.45 |
| NM_005127.2    | CLEC2B       | C-type lectin domain family 2, member B                      | 1.14 |
| NM_194450.2    | CLEC4A       | C-type lectin domain family 4, member A                      | 1.51 |
| NM_182523.1    | CMC1         | COX assembly mitochondrial protein 1 homolog (S. Cerevisiae) | 1.34 |
| NM_020188.3    | CMC2         | COX assembly mitochondrial protein 2 homolog (S. Cerevisiae) | 1.19 |
| NM_014184.3    | CNIH4        | Cornichon family AMPA receptor auxiliary protein 4           | 1.37 |
| NM_001008215.2 | COA5         | Cytochrome c oxidase assembly factor 5                       | 1.41 |
| NM_152516.2    | COMMD1       | Copper metabolism (Murr1) domain containing 1                | 1.04 |
| NM_012071.3    | COMMD3       | COMM domain containing 3                                     | 1.53 |
| XM_085023.6    | COMMD6       | COMM domain containing 6                                     | 1.63 |
| NM_017845.3    | COMMD8       | COMM domain containing 8                                     | 1.35 |
| NM_001258006.1 | COPS4        | COP9 signalosome subunit 4                                   | 1.13 |
| XM_005251137.1 | COPS5        | COP9 signalosome subunit 5                                   | 1.37 |
| NM_032901.3    | COX14        | Cytochrome c oxidase assembly homolog 14 (S. Cerevisiae)     | 2.34 |
| NM_016468.6    | COX16        | COX16 cytochrome c oxidase assembly homolog (S. Cerevisiae)  | 1.25 |
| NM_005694.1    | COX17        | COX17 cytochrome c oxidase copper chaperone                  | 1.10 |
| NM_001862.2    | COX5B        | Cytochrome c oxidase subunit Vb                              | 1.64 |
| NM_001863.4    | COX6B1       | Cytochrome c oxidase subunit vib polypeptide 1 (ubiquitous)  | 1.24 |
| NM_004374.3    | COX6C        | Cytochrome c oxidase subunit vic                             | 2.17 |
| NM_001865.3    | COX7A2       | Cytochrome c oxidase subunit viia polypeptide 2 (liver)      | 2.20 |
| NM_001866.2    | COX7B        | Cytochrome c oxidase subunit viib                            | 1.63 |
| NM_001867.2    | COX7C        | Cytochrome c oxidase subunit viic                            | 2.11 |
| NM_004074.2    | COX8A        | Cytochrome c oxidase subunit VIIIA (ubiquitous)              | 1.98 |
| NM_019029.2    | CPVL         | Carboxypeptidase, vitellogenic-like                          | 1.38 |
| NM_175918.3    | CRIPAK       | Cysteine-rich PAK1 inhibitor                                 | 1.67 |
| NM_000099.2    | CST3         | Cystatin C                                                   | 1.19 |
| NM_005213.3    | CSTA         | Cystatin A (stefin A)                                        | 2.02 |
| NM_016403.3    | CWC15        | CWC15 spliceosome-associated protein homolog (S. Cerevisiae) | 1.78 |
| NM_007022.3    | CYB561D2     | Cytochrome b561 family, member D2                            | 1.05 |
| NM_148923.3    | CYB5A        | Cytochrome b5 type A (microsomal)                            | 1.16 |
| NM_018947.5    | CYCS         | Cytochrome c, somatic                                        | 1.09 |
| XM_005248858.1 | DAXX         | Death-domain associated protein                              | 1.03 |
| XM_005248974.1 | DDAH2        | Dimethylarginine dimethylaminohydrolase 2                    | 1.08 |
| XM_005250808.1 | DECRI        | 2,4-dienoyl coa reductase 1, mitochondrial                   | 1.03 |
| NM_006519.2    | DYNLT1       | Dynein, light chain, Tctex-type 1                            | 1.41 |
| NM_006520.2    | DYNLT3       | Dynein, light chain, Tctex-type 3                            | 1.10 |
| NM_032565.4    | EBPL         | Emopamil binding protein-like                                | 1.14 |
| XM_005267047.1 | ECHDC1       | Enoyl coa hydratase domain containing 1                      | 1.11 |
| NM_001037663.1 | EEF1B2       | Eukaryotic translation elongation factor 1 beta 2            | 1.16 |
| NM_005875.2    | EIF1B        | Eukaryotic translation initiation factor 1B                  | 1.37 |
| NM_004846.2    | EIF4E2       | Eukaryotic translation initiation factor 4E family member 2  | 1.63 |
| NM_006331.7    | EMG1         | EMG1 N1-specific pseudouridine methyltransferase             | 1.19 |
| NM_001425.2    | EMP3         | Epithelial membrane protein 3                                | 1.40 |
| NR_015370.2    | EPB41L4A-AS1 | EPB41L4A antisense RNA 1                                     | 1.12 |
| XM_005266278.1 | ESD          | Esterase D                                                   | 1.24 |
| NM_000126.3    | ETFA         | Electron-transfer-flavoprotein, alpha polypeptide            | 1.13 |
| NM_015004.3    | EXOSC7       | Exosome component 7                                          | 1.35 |

|                |           |                                                                  |      |
|----------------|-----------|------------------------------------------------------------------|------|
| NM_031452.3    | FAM103A1  | Family with sequence similarity 103, member A1                   | 1.46 |
| NM_031213.3    | FAM108A1  | Abhydrolase domain containing 17A                                | 1.01 |
| NM_014367.3    | FAM162A   | Family with sequence similarity 162, member A                    | 1.21 |
| NM_058182.4    | FAM165B   | Small integral membrane protein 11                               | 1.15 |
| NM_152274.4    | FAM58A    | Family with sequence similarity 58, member A                     | 1.02 |
| XM_005258656.1 | FCGRT     | Fc fragment of igg, receptor, transporter, alpha                 | 1.30 |
| NM_002013.3    | FKBP3     | FK506 binding protein 3, 25kda                                   | 1.16 |
| NM_002027.2    | FNTA      | Farnesyltransferase, CAAX box, alpha                             | 1.03 |
| NM_007285.6    | GABARAPL2 | GABA(A) receptor-associated protein-like 2                       | 1.11 |
| NR_003191.1    | GGTA1P    | Glycoprotein, alpha-galactosyltransferase 1 pseudogene           | 1.51 |
| NM_015660.2    | GIMAP2    | Gtpase, IMAP family member 2                                     | 1.18 |
| NM_015710.4    | GLTSCR2   | Glioma tumor suppressor candidate region gene 2                  | 1.15 |
| NM_006613.3    | GRAP      | GRB2-related adaptor protein                                     | 1.23 |
| NM_004832.2    | GSTO1     | Glutathione S-transferase omega 1                                | 2.11 |
| NM_004492.2    | GTF2A2    | General transcription factor IIA, 2, 12kda                       | 1.12 |
| NM_207118.2    | GTF2H5    | General transcription factor IIH, polypeptide 5                  | 1.13 |
| NM_002104.2    | GZMK      | Granzyme K (granzyme 3; tryptase II)                             | 1.00 |
| NM_002106.3    | H2AFZ     | H2A histone family, member Z                                     | 1.60 |
| NM_002107.4    | H3F3A     | H3 histone, family 3A                                            | 1.00 |
| NM_000518.4    | HBB       | Hemoglobin, beta                                                 | 1.40 |
| NM_006402.2    | HBXIP     | Late endosomal/lysosomal adaptor, MAPK and MTOR activator 5      | 1.09 |
| XM_005254328.1 | HDC       | Histidine decarboxylase                                          | 1.04 |
| NM_015987.4    | HEBP1     | Heme binding protein 1                                           | 1.34 |
| NM_006120.3    | HLA-DMA   | Major histocompatibility complex, class II, DM alpha             | 1.12 |
| NM_022555.3    | HLA-DRB3  | Major histocompatibility complex, class II, DR beta 3            | 1.10 |
| NM_021983.4    | HLA-DRB4  | Major histocompatibility complex, class II, DR beta 4            | 1.03 |
| NM_001130688.1 | HMGB2     | High mobility group box 2                                        | 1.16 |
| NM_004965.6    | HMGN1     | High mobility group nucleosome binding domain 1                  | 1.07 |
| NM_004242.3    | HMGN3     | High mobility group nucleosomal binding domain 3                 | 1.34 |
| NM_031157.2    | HNRNPA1   | Heterogeneous nuclear ribonucleoprotein A1                       | 2.48 |
| XM_005269748.1 | HNRNPH3   | Heterogeneous nuclear ribonucleoprotein H3 (2H9)                 | 1.05 |
| NM_004493.2    | HSD17B10  | Hydroxysteroid (17-beta) dehydrogenase 10                        | 1.14 |
| NM_016245.3    | HSD17B11  | Hydroxysteroid (17-beta) dehydrogenase 11                        | 1.12 |
| NM_014234.4    | HSD17B8   | Hydroxysteroid (17-beta) dehydrogenase 8                         | 1.26 |
| NM_016126.2    | HSPB11    | Heat shock protein family B (small), member 11                   | 1.93 |
| NM_002157.2    | HSPE1     | Heat shock 10kda protein 1 (chaperonin 10)                       | 1.20 |
| NM_001098521.1 | HTATIP2   | HIV-1 Tat interactive protein 2, 30kda                           | 1.23 |
| NM_032036.2    | IFI27L2   | Interferon, alpha-inducible protein 27-like 2                    | 1.03 |
| NM_004221.4    | IL32      | Interleukin 32                                                   | 1.06 |
| XM_005274431.1 | IL3RA     | Interleukin 3 receptor, alpha (low affinity)                     | 1.34 |
| NM_001564.2    | ING2      | Inhibitor of growth family, member 2                             | 1.06 |
| NM_004763.3    | ITGB1BP1  | Integrin beta 1 binding protein 1                                | 1.10 |
| NM_004867.4    | ITM2A     | Integral membrane protein 2A                                     | 1.43 |
| NM_001267623.1 | ITPA      | Inosine triphosphatase (nucleoside triphosphate pyrophosphatase) | 1.44 |
| XM_005250233.1 | KLHDC10   | Kelch domain containing 10                                       | 1.86 |
| NM_002258.2    | KLRB1     | Killer cell lectin-like receptor subfamily B, member 1           | 1.41 |
| NM_173852.3    | KRTCAP2   | Keratinocyte associated protein 2                                | 1.12 |
| NM_001032998.1 | KYNU      | Kynureninase                                                     | 1.47 |
| NM_014017.3    | LAMTOR2   | Late endosomal/lysosomal adaptor, MAPK and MTOR activator 2      | 1.32 |
| NM_002300.6    | LDHB      | Lactate dehydrogenase B                                          | 1.32 |

|                |           |                                                                                  |      |
|----------------|-----------|----------------------------------------------------------------------------------|------|
| NM_002305.3    | LGALS1    | Lectin, galactoside-binding, soluble, 1                                          | 1.30 |
| NM_006498.2    | LGALS2    | Lectin, galactoside-binding, soluble, 2                                          | 2.80 |
| XR_042051.1    | LINC00152 | Long intergenic non-protein coding RNA 152                                       | 1.05 |
| XR_241187.1    | LINC00339 | Long intergenic non-protein coding RNA 339                                       | 1.12 |
| BC014670.1     | LOC147727 | Hypothetical protein LOC147727, mrna (cdna clone IMAGE:4864993), partial cds     | 2.01 |
| BC065765.1     | LOC401397 | Hypothetical LOC401397, mrna (cdna clone IMAGE:4699553)                          | 1.37 |
| NM_005767.5    | LPAR6     | Lysophosphatidic acid receptor 6                                                 | 1.56 |
| NM_018334.4    | LRRN3     | Leucine rich repeat neuronal 3                                                   | 1.01 |
| NM_014463.2    | LSM3      | LSM3 homolog, U6 small nuclear RNA associated (S. Cerevisiae)                    | 1.29 |
| NM_001130710.1 | LSM5      | LSM5 homolog, U6 small nuclear RNA associated (S. Cerevisiae)                    | 2.00 |
| NM_007080.2    | LSM6      | LSM6 homolog, U6 small nuclear RNA associated (S. Cerevisiae)                    | 1.58 |
| NM_002341.1    | LTB       | Lymphotoxin beta (TNF superfamily, member 3)                                     | 1.47 |
| NM_014060.2    | MCTS1     | Malignant T cell amplified sequence 1                                            | 2.13 |
| NM_138476.3    | MDP1      | Magnesium-dependent phosphatase 1                                                | 1.34 |
| NM_004269.3    | MED27     | Mediator complex subunit 27                                                      | 2.24 |
| NM_014166.3    | MED4      | Mediator complex subunit 4                                                       | 1.39 |
| NM_004270.4    | MED7      | Mediator complex subunit 7                                                       | 1.19 |
| NM_001410.2    | MEGF8     | Multiple EGF-like-domains 8                                                      | 1.10 |
| NM_019852.3    | METTL3    | Methyltransferase like 3                                                         | 1.27 |
| NM_032889.4    | MFSD5     | Major facilitator superfamily domain containing 5                                | 1.67 |
| NM_002413.4    | MGST2     | Microsomal glutathione S-transferase 2                                           | 2.10 |
| NM_004528.3    | MGST3     | Microsomal glutathione S-transferase 3                                           | 2.04 |
| NR_029519.1    | MIR103A2  | Microrna 103a-2                                                                  | 1.10 |
| NR_029683.1    | MIR142    | Microrna 142                                                                     | 1.81 |
| NM_138798.1    | MITD1     | MIT, microtubule interacting and transport, domain containing 1                  | 1.33 |
| NM_002432.1    | MNDA      | Myeloid cell nuclear differentiation antigen                                     | 1.57 |
| NM_023075.5    | MPPE1     | Metallophosphoesterase 1                                                         | 1.09 |
| NM_014078.5    | MRPL13    | Mitochondrial ribosomal protein L13                                              | 1.37 |
| NM_017971.3    | MRPL20    | Mitochondrial ribosomal protein L20                                              | 1.41 |
| NM_181512.1    | MRPL21    | Mitochondrial ribosomal protein L21                                              | 1.00 |
| NM_004891.3    | MRPL33    | Mitochondrial ribosomal protein L33                                              | 1.91 |
| NM_017446.3    | MRPL39    | Mitochondrial ribosomal protein L39                                              | 1.22 |
| NM_016497.3    | MRPL51    | Mitochondrial ribosomal protein L51                                              | 1.12 |
| NM_180982.2    | MRPL52    | Mitochondrial ribosomal protein L52                                              | 1.32 |
| NM_053050.4    | MRPL53    | Mitochondrial ribosomal protein L53                                              | 1.09 |
| NM_016070.3    | MRPS23    | Mitochondrial ribosomal protein S23                                              | 1.37 |
| NM_022497.3    | MRPS25    | Mitochondrial ribosomal protein S25                                              | 1.09 |
| NM_016640.3    | MRPS30    | Mitochondrial ribosomal protein S30                                              | 1.27 |
| NM_005830.3    | MRPS31    | Mitochondrial ribosomal protein S31                                              | 1.48 |
| NM_053035.2    | MRPS33    | Mitochondrial ribosomal protein S33                                              | 2.02 |
| XM_005274395.1 | MS4A1     | Membrane-spanning 4-domains, subfamily A, member 1                               | 1.16 |
| NM_001031666.1 | MS4A3     | Membrane-spanning 4-domains, subfamily A, member 3 (hematopoietic cell-specific) | 1.20 |
| XM_005274177.1 | MS4A6A    | Membrane-spanning 4-domains, subfamily A, member 6A                              | 2.25 |
| NM_016100.4    | NAA20     | N(alpha)-acetyltransferase 20, natb catalytic subunit                            | 1.44 |
| NM_016200.4    | NAA38     | N(alpha)-acetyltransferase 38, natc auxiliary subunit                            | 1.16 |
| NM_004541.3    | NDUFA1    | NADH dehydrogenase (ubiquinone) 1 alpha subcomplex, 1, 7.5kda                    | 3.11 |
| NM_002488.4    | NDUFA2    | NADH dehydrogenase (ubiquinone) 1 alpha subcomplex, 2, 8kda                      | 2.06 |
| NM_014222.2    | NDUFA8    | NADH dehydrogenase (ubiquinone) 1 alpha subcomplex, 8, 19kda                     | 1.20 |
| NM_005002.4    | NDUFA9    | NADH dehydrogenase (ubiquinone) 1 alpha subcomplex, 9, 39kda                     | 1.51 |

|                |           |                                                                                   |      |
|----------------|-----------|-----------------------------------------------------------------------------------|------|
| NM_005003.2    | NDUFAB1   | NADH dehydrogenase (ubiquinone) 1, alpha/beta subcomplex, 1, 8kda                 | 2.26 |
| NM_004548.2    | NDUFB10   | NADH dehydrogenase (ubiquinone) 1 beta subcomplex, 10, 22kda                      | 1.45 |
| NM_004546.2    | NDUFB2    | NADH dehydrogenase (ubiquinone) 1 beta subcomplex, 2, 8kda                        | 1.41 |
| NM_004547.5    | NDUFB4    | NADH dehydrogenase (ubiquinone) 1 beta subcomplex, 4, 15kda                       | 1.44 |
| NM_002493.4    | NDUFB6    | NADH dehydrogenase (ubiquinone) 1 beta subcomplex, 6, 17kda                       | 1.98 |
| NM_005005.2    | NDUFB9    | NADH dehydrogenase (ubiquinone) 1 beta subcomplex, 9, 22kda                       | 1.30 |
| NM_002494.3    | NDUFC1    | NADH dehydrogenase (ubiquinone) 1, subcomplex unknown, 1, 6kda                    | 1.34 |
| NM_004549.5    | NDUFC2    | NADH dehydrogenase (ubiquinone) 1, subcomplex unknown, 2, 14.5kda                 | 1.42 |
| NM_002495.2    | NDUFS4    | NADH dehydrogenase (ubiquinone) Fe-S protein 4, 18kda (NADH-coenzyme Q reductase) | 1.51 |
| NM_004552.2    | NDUFS5    | NADH dehydrogenase (ubiquinone) Fe-S protein 5, 15kda (NADH-coenzyme Q reductase) | 1.40 |
| NM_004553.4    | NDUFS6    | NADH dehydrogenase (ubiquinone) Fe-S protein 6, 13kda (NADH-coenzyme Q reductase) | 1.47 |
| NM_021074.4    | NDUFV2    | NADH dehydrogenase (ubiquinone) flavoprotein 2, 24kda                             | 1.52 |
| NM_006156.2    | NEDD8     | Neural precursor cell expressed, developmentally down-regulated 8                 | 1.50 |
| NM_015700.3    | NFU1      | NFU1 iron-sulfur cluster scaffold homolog (S. Cerevisiae)                         | 1.20 |
| XM_005265316.1 | NGLY1     | N-glycanase 1                                                                     | 1.07 |
| NM_015469.1    | NIPSNAP3A | Nipsnap homolog 3A (C. Elegans)                                                   | 1.16 |
| XM_005258964.1 | NOSIP     | Nitric oxide synthase interacting protein                                         | 1.43 |
| NM_006545.4    | NPRL2     | Nitrogen permease regulator-like 2 (S. Cerevisiae)                                | 1.02 |
| NM_145080.3    | NSMCE1    | Non-SMC element 1 homolog (S. Cerevisiae)                                         | 1.49 |
| NM_032324.1    | NTPCR     | Nucleoside-triphosphatase, cancer-related                                         | 1.04 |
| NM_145266.4    | NUDCD2    | Nudc domain containing 2                                                          | 1.15 |
| NM_000274.3    | OAT       | Ornithine aminotransferase                                                        | 1.10 |
| NM_152398.2    | OCIAD2    | OCIA domain containing 2                                                          | 2.07 |
| NM_024960.4    | PANK2     | Pantothenate kinase 2                                                             | 2.27 |
| NM_003631.2    | PARG      | Poly (ADP-ribose) glycohydrolase                                                  | 1.22 |
| NM_018622.5    | PARL      | Presenilin associated, rhomboid-like                                              | 1.01 |
| NM_000925.3    | PDHB      | Pyruvate dehydrogenase (lipoamide) beta                                           | 1.33 |
| NM_002567.2    | PEBP1     | Phosphatidylethanolamine binding protein 1                                        | 1.25 |
| XM_005265696.1 | PF4       | Platelet factor 4                                                                 | 1.54 |
| NM_002623.3    | PFDN4     | Prefoldin subunit 4                                                               | 1.38 |
| NM_014260.3    | PFDN6     | Prefoldin subunit 6                                                               | 1.09 |
| NM_017916.2    | PIH1D1    | PIH1 domain containing 1                                                          | 1.24 |
| NM_001001852.3 | PIM3      | Pim-3 oncogene                                                                    | 1.25 |
| NM_006223.3    | PIN4      | Protein (peptidylprolyl cis/trans isomerase) NIMA-interacting, 4 (parvulin)       | 1.54 |
| NM_004279.2    | PMPCB     | Peptidase (mitochondrial processing) beta                                         | 1.04 |
| NM_019896.2    | POLE4     | Polymerase (DNA-directed), epsilon 4, accessory subunit                           | 1.19 |
| NM_021974.3    | POLR2F    | Polymerase (RNA) II (DNA directed) polypeptide F                                  | 1.08 |
| NM_006232.3    | POLR2H    | Polymerase (RNA) II (DNA directed) polypeptide H                                  | 1.06 |
| NM_006233.4    | POLR2I    | Polymerase (RNA) II (DNA directed) polypeptide I, 14.5kda                         | 1.12 |
| NM_006234.4    | POLR2J    | Polymerase (RNA) II (DNA directed) polypeptide J, 13.3kda                         | 1.17 |
| NM_015932.5    | POMP      | Proteasome maturation protein                                                     | 1.14 |
| NM_015918.3    | POP5      | Processing of precursor 5, ribonuclease P/MRP subunit (S. Cerevisiae)             | 1.23 |
| NM_006112.3    | PPIE      | Peptidylprolyl isomerase E (cyclophilin E)                                        | 1.26 |
| NM_002712.2    | PPP1R7    | Protein phosphatase 1, regulatory subunit 7                                       | 1.19 |
| NM_017917.2    | PPP2R3C   | Protein phosphatase 2, regulatory subunit B", gamma                               | 1.03 |
| NM_015342.3    | PPWD1     | Peptidylprolyl isomerase domain and WD repeat containing 1                        | 1.14 |
| NM_181697.2    | PRDX1     | Peroxiredoxin 1                                                                   | 1.12 |
| NM_007173.4    | PRSS23    | Protease, serine, 23                                                              | 1.09 |

|                |          |                                                                       |      |
|----------------|----------|-----------------------------------------------------------------------|------|
| NM_002787.4    | PSMA2    | Proteasome (prosome, macropain) subunit, alpha type, 2                | 1.81 |
| NM_002788.3    | PSMA3    | Proteasome (prosome, macropain) subunit, alpha type, 3                | 1.49 |
| NM_002790.3    | PSMA5    | Proteasome (prosome, macropain) subunit, alpha type, 5                | 1.06 |
| NM_002792.3    | PSMA7    | Proteasome (prosome, macropain) subunit, alpha type, 7                | 1.57 |
| NM_002793.3    | PSMB1    | Proteasome (prosome, macropain) subunit, beta type, 1                 | 1.43 |
| NM_002801.3    | PSMB10   | Proteasome (prosome, macropain) subunit, beta type, 10                | 1.99 |
| NM_002805.5    | PSMC5    | Proteasome (prosome, macropain) 26S subunit, atpase, 5                | 1.15 |
| NM_002806.3    | PSMC6    | Proteasome (prosome, macropain) 26S subunit, atpase, 6                | 1.80 |
| NM_014814.2    | PSMD6    | Proteasome (prosome, macropain) 26S subunit, non-atpase, 6            | 1.05 |
| NM_002813.5    | PSMD9    | Proteasome (prosome, macropain) 26S subunit, non-atpase, 9            | 1.18 |
| XM_005264248.1 | QPCT     | Glutaminyl-peptide cyclotransferase                                   | 1.47 |
| NM_130781.2    | RAB24    | RAB24, member RAS oncogene family                                     | 1.19 |
| NM_006834.3    | RAB32    | RAB32, member RAS oncogene family                                     | 1.15 |
| NM_004582.3    | RABGGTB  | Rab geranylgeranyltransferase, beta subunit                           | 1.31 |
| NM_006989.5    | RASA4    | RAS p21 protein activator 4                                           | 2.60 |
| NM_005105.4    | RBM8A    | RNA binding motif protein 8A                                          | 1.37 |
| NM_052960.2    | RBP7     | Retinol binding protein 7, cellular                                   | 1.77 |
| NM_014248.3    | RBX1     | Ring-box 1, E3 ubiquitin protein ligase                               | 1.40 |
| NM_001001330.2 | REEP3    | Receptor accessory protein 3                                          | 1.98 |
| NM_001033002.3 | RPAIN    | RPA interacting protein                                               | 1.01 |
| NM_007104.4    | RPL10A   | Ribosomal protein l10a                                                | 1.73 |
| NM_000977.3    | RPL13    | Ribosomal protein L13                                                 | 1.20 |
| NM_002948.3    | RPL15    | Ribosomal protein L15                                                 | 1.47 |
| NM_000983.3    | RPL22    | Ribosomal protein L22                                                 | 2.56 |
| XM_114317.7    | RPL22L1  | Ribosomal protein L22-like 1                                          | 1.57 |
| NM_000987.3    | RPL26    | Ribosomal protein L26                                                 | 1.10 |
| NM_001098577.2 | RPL31    | Ribosomal protein L31                                                 | 2.68 |
| NM_000994.3    | RPL32    | Ribosomal protein L32                                                 | 1.08 |
| NM_052969.1    | RPL39L   | Ribosomal protein L39-like                                            | 1.17 |
| XM_005249271.1 | RPS10    | Ribosomal protein S10                                                 | 2.01 |
| NG_011176.1    | RPS14P3  | Ribosomal protein S14 pseudogene 3                                    | 1.23 |
| NG_010375.1    | RPS18P9  | Ribosomal protein S18 pseudogene 9                                    | 1.17 |
| NM_001028.2    | RPS25    | Ribosomal protein S25                                                 | 1.57 |
| NM_001029.3    | RPS26    | Ribosomal protein S26                                                 | 1.46 |
| NR_002309.1    | RPS26P11 | Ribosomal protein S26 pseudogene 11                                   | 2.27 |
| NM_001030001.2 | RPS29    | Ribosomal protein S29                                                 | 1.50 |
| NM_001009.3    | RPS5     | Ribosomal protein S5                                                  | 1.89 |
| NM_001011.3    | RPS7     | Ribosomal protein S7                                                  | 1.26 |
| NM_015485.4    | RWDD3    | RWD domain containing 3                                               | 1.22 |
| NM_002961.2    | S100A4   | S100 calcium binding protein A4                                       | 1.94 |
| NM_014624.3    | S100A6   | S100 calcium binding protein A6                                       | 1.51 |
| NM_002965.3    | S100A9   | S100 calcium binding protein A9                                       | 1.74 |
| NM_033082.3    | SARNP    | SAP domain containing ribonucleoprotein                               | 1.39 |
| NM_133491.3    | SAT2     | Spermi dine/spermine N1-acetyltransferase family member 2             | 1.05 |
| NM_024041.3    | SCNM1    | Sodium channel modifier 1                                             | 1.11 |
| NM_005138.2    | SCO2     | SCO2 cytochrome c oxidase assembly protein                            | 1.20 |
| XM_005263170.1 | SCOC     | Short coiled-coil protein                                             | 1.23 |
| NM_006923.3    | SDF2     | Stromal cell-derived factor 2                                         | 1.06 |
| NM_022044.2    | SDF2L1   | Stromal cell-derived factor 2-like 1                                  | 1.27 |
| NR_003265.3    | SDHAP2   | Succinate dehydrogenase complex, subunit A, flavoprotein pseudogene 2 | 1.12 |

|                |          |                                                                                    |      |
|----------------|----------|------------------------------------------------------------------------------------|------|
| NM_003000.2    | SDHB     | Succinate dehydrogenase complex, subunit B, iron sulfur (Ip)                       | 1.20 |
| NM_014302.3    | SEC61G   | Sec61 gamma subunit                                                                | 2.76 |
| NM_001122752.1 | SERPINI1 | Serpin peptidase inhibitor, clade I (neuroserpin), member 1                        | 1.27 |
| NM_016047.3    | SF3B14   | Splicing factor 3B, 14 kda subunit (SF3B14), mrna                                  | 1.41 |
| NM_031287.2    | SF3B5    | Splicing factor 3b, subunit 5, 10kda                                               | 1.14 |
| NM_145169.1    | SFT2D1   | SFT2 domain containing 1                                                           | 1.91 |
| NM_006304.1    | SHFM1    | Split hand/foot malformation (ectrodactyly) type 1                                 | 1.66 |
| NM_001126105.2 | SLC7A7   | Solute carrier family 7 (amino acid transporter light chain, y+L system), member 7 | 1.32 |
| NM_005901.5    | SMAD2    | SMAD family member 2                                                               | 1.31 |
| NR_024127.1    | SNHG12   | Small nucleolar RNA host gene 12 (non-protein coding)                              | 1.55 |
| NR_002576.1    | SNORA21  | Small nucleolar RNA, H/ACA box 21                                                  | 1.10 |
| NR_002987.1    | SNORA61  | Small nucleolar RNA, H/ACA box 61                                                  | 1.06 |
| NR_004380.1    | SNORD104 | Small nucleolar RNA, C/D box 104                                                   | 1.18 |
| NR_000018.1    | SNORD35A | Small nucleolar RNA, C/D box 35A                                                   | 1.18 |
| NR_000016.1    | SNORD36C | Small nucleolar RNA, C/D box 36C                                                   | 1.36 |
| NR_000007.1    | SNORD73A | Small nucleolar RNA, C/D box 73A                                                   | 1.08 |
| NR_003940.1    | SNORD80  | Small nucleolar RNA, C/D box 80                                                    | 1.12 |
| NM_006938.2    | SNRPD1   | Small nuclear ribonucleoprotein D1 polypeptide 16kda                               | 1.03 |
| NM_003094.2    | SNRPE    | Small nuclear ribonucleoprotein polypeptide E                                      | 1.71 |
| NM_003095.2    | SNRPF    | Small nuclear ribonucleoprotein polypeptide F                                      | 2.04 |
| NM_003096.2    | SNRPG    | Small nuclear ribonucleoprotein polypeptide G                                      | 1.40 |
| NM_003097.3    | SNRPN    | Small nuclear ribonucleoprotein polypeptide N                                      | 1.56 |
| NM_014748.3    | SNX17    | Sorting nexin 17                                                                   | 1.06 |
| NM_000454.4    | SOD1     | Superoxide dismutase 1, soluble                                                    | 1.60 |
| NM_004890.2    | SPAG7    | Sperm associated antigen 7                                                         | 1.31 |
| NM_014752.2    | SPCS2    | Signal peptidase complex subunit 2 homolog (S. Cerevisiae)                         | 1.54 |
| NM_001166103.1 | SPINT2   | Serine peptidase inhibitor, Kunitz type, 2                                         | 1.28 |
| NM_138288.3    | SPTSSA   | Serine palmitoyltransferase, small subunit A                                       | 1.07 |
| NM_003130.3    | SRI      | Sorcin                                                                             | 1.64 |
| NM_001031684.2 | SRSF7    | Serine/arginine-rich splicing factor 7                                             | 1.51 |
| NM_003143.2    | SSBP1    | Single-stranded DNA binding protein 1, mitochondrial                               | 1.58 |
| XM_005249880.1 | STARD3NL | STARD3 N-terminal like                                                             | 1.06 |
| NM_004853.2    | STX8     | Syntaxin 8                                                                         | 1.33 |
| NM_016086.2    | STYXL1   | Serine/threonine/tyrosine interacting-like 1                                       | 1.09 |
| NM_003172.3    | SURF1    | Surfeit 1                                                                          | 1.15 |
| NM_015484.4    | SYF2     | SYF2 pre-mrna-splicing factor                                                      | 1.49 |
| NM_016283.4    | TAF9     | TAF9 RNA polymerase II, TATA box binding protein (TBP)-associated factor, 32kda    | 1.23 |
| NM_032026.3    | TATDN1   | Tatd dnase domain containing 1                                                     | 1.64 |
| NM_004607.2    | TBCA     | Tubulin folding cofactor A                                                         | 1.64 |
| NM_005648.3    | TCEB1    | Transcription elongation factor B (SIII), polypeptide 1 (15kda, elongin C)         | 1.24 |
| NM_152773.4    | TCTEX1D2 | Tctex1 domain containing 2                                                         | 1.49 |
| NM_138501.5    | TECR     | Trans-2,3-enoyl-coa reductase                                                      | 1.11 |
| NM_025075.2    | THOC7    | THO complex 7 homolog (Drosophila)                                                 | 1.30 |
| NM_012456.2    | TIMM10   | Translocase of inner mitochondrial membrane 10 homolog (yeast)                     | 1.02 |
| NM_012458.3    | TIMM13   | Translocase of inner mitochondrial membrane 13 homolog (yeast)                     | 1.12 |
| NM_006335.2    | TIMM17A  | Translocase of inner mitochondrial membrane 17 homolog A (yeast)                   | 1.35 |
| NM_012459.2    | TIMM8B   | Translocase of inner mitochondrial membrane 8 homolog B (yeast)                    | 1.04 |
| NM_012460.2    | TIMM9    | Translocase of inner mitochondrial membrane 9 homolog (yeast)                      | 1.02 |
| NM_018447.2    | TMEM111  | ER membrane protein complex subunit 3                                              | 1.12 |

|                |           |                                                                    |      |
|----------------|-----------|--------------------------------------------------------------------|------|
| NM_032273.3    | TMEM126A  | Transmembrane protein 126A                                         | 1.95 |
| NM_018480.4    | TMEM126B  | Transmembrane protein 126B                                         | 1.41 |
| NM_032928.3    | TMEM141   | Transmembrane protein 141                                          | 1.68 |
| NM_032635.3    | TMEM147   | Transmembrane protein 147                                          | 1.34 |
| NM_014051.3    | TMEM14A   | Transmembrane protein 14A                                          | 1.75 |
| NM_016462.3    | TMEM14C   | Transmembrane protein 14C                                          | 1.09 |
| NM_053045.1    | TMEM203   | Transmembrane protein 203                                          | 1.82 |
| NM_198536.2    | TMEM205   | Transmembrane protein 205                                          | 1.16 |
| NM_014187.3    | TMEM208   | Transmembrane protein 208                                          | 1.31 |
| NM_032936.3    | TMEM60    | Transmembrane protein 60                                           | 1.72 |
| NM_015959.3    | TMX2      | Thioredoxin-related transmembrane protein 2                        | 1.09 |
| NM_019059.3    | TOMM7     | Translocase of outer mitochondrial membrane 7 homolog (yeast)      | 2.56 |
| NM_016058.2    | TPRKB     | TP53RK binding protein                                             | 1.62 |
| NM_024108.2    | TRAPPC6A  | Trafficking protein particle complex 6A                            | 1.30 |
| NM_017910.3    | TRMT61B   | Trna methyltransferase 61 homolog B (S. Cerevisiae)                | 1.04 |
| NM_007311.3    | TSPO      | Translocator protein (18kda)                                       | 1.31 |
| NM_001270483.1 | TST       | Thiosulfate sulfurtransferase (rhodanese)                          | 1.14 |
| NM_001008237.1 | TTC32     | Tetratricopeptide repeat domain 32                                 | 1.78 |
| NM_005783.3    | TXNDC9    | Thioredoxin domain containing 9                                    | 1.03 |
| NM_006701.2    | TXNL4A    | Thioredoxin-like 4A                                                | 1.28 |
| NM_144987.2    | U2AF1L4   | U2 small nuclear RNA auxiliary factor 1-like 4                     | 1.02 |
| NM_006357.3    | UBE2E3    | Ubiquitin-conjugating enzyme E2E 3                                 | 1.19 |
| NM_016406.3    | UFC1      | Ubiquitin-fold modifier conjugating enzyme 1                       | 1.33 |
| NM_014044.5    | UNC50     | Unc-50 homolog (C. Elegans)                                        | 1.99 |
| NM_006003.2    | UQCRFS1   | Ubiquinol-cytochrome c reductase, Rieske iron-sulfur polypeptide 1 | 1.51 |
| NM_006004.2    | UQCRH     | Ubiquinol-cytochrome c reductase hinge protein                     | 1.80 |
| NM_014402.4    | UQCRQ     | Ubiquinol-cytochrome c reductase, complex III subunit VII, 9.5kda  | 1.54 |
| NM_032747.3    | USMG5     | Up-regulated during skeletal muscle growth 5 homolog (mouse)       | 1.99 |
| NM_003761.4    | VAMP8     | Vesicle-associated membrane protein 8                              | 1.57 |
| NM_198481.3    | VSTM1     | V-set and transmembrane domain containing 1                        | 1.35 |
| NM_025234.1    | WDR61     | WD repeat domain 61                                                | 1.60 |
| NM_018081.2    | WRAP53    | WD repeat containing, antisense to TP53                            | 1.05 |
| NM_058181.1    | YBEY      | Ybey metalloproteinase (putative)                                  | 1.14 |
| NM_024699.2    | ZFAND1    | Zinc finger, AN1-type domain 1                                     | 1.01 |
| NM_006963.4    | ZMAT2     | Zinc finger, matrin-type 2                                         | 1.14 |
| NM_006963.4    | ZNF22     | Zinc finger protein 22                                             | 1.02 |
| NM_021994.2    | ZNF277    | Zinc finger protein 277                                            | 1.11 |
| NM_033414.2    | ZNF622    | Zinc finger protein 622                                            | 1.23 |
| NR_003604.2    | ZNFX1-AS1 | ZNFX1 antisense RNA 1                                              | 1.16 |

**Table 2S.** List of all genes resulted down-regulated in RTT vs controls by LIMMA and SAM analyses.

| NCBI Ref. Seq. | Gene symbol | Gene name                                                                               | FC    |
|----------------|-------------|-----------------------------------------------------------------------------------------|-------|
| NM_170601.4    | SIAE        | Sialic acid acetyltransferase                                                           | - 2.3 |
| NR_002312.1    | RPPH1       | Ribonuclease P RNA component H1                                                         | - 2.2 |
| NM_005322.2    | HIST1H1B    | Histone cluster 1, h1b                                                                  | - 1.8 |
| NM_000902.3    | MME         | Membrane metallo-endopeptidase                                                          | - 1.8 |
| NM_032047.4    | B3GNT5      | UDP-glcnac:betagal beta-1,3-N-acetylglucosaminyltransferase 5                           | - 1.7 |
| NM_003513.2    | HIST1H2AB   | Histone cluster 1, h2ab                                                                 | - 1.7 |
| NR_002562.1    | SNORD28     | Small nucleolar RNA, C/D box 28                                                         | - 1.5 |
| NM_004668.2    | MGAM        | Maltase-glucoamylase (alpha-glucosidase)                                                | - 1.5 |
| NM_012081.5    | ELL2        | Elongation factor, RNA polymerase II, 2                                                 | - 1.4 |
| NM_021066.2    | HIST1H2AJ   | Histone cluster 1, h2aj                                                                 | - 1.4 |
| NM_002424.2    | MMP8        | Matrix metalloproteinase 8 (neutrophil collagenase)                                     | - 1.4 |
| NM_004994.2    | MMP9        | Matrix metalloproteinase 9 (gelatinase B, 92kda gelatinase, 92kda type IV collagenase)  | - 1.4 |
| NM_003533.2    | HIST1H3I    | Histone cluster 1, h3i                                                                  | - 1.3 |
| NG_000861.4    | GK3P        | Glycerol kinase 3 pseudogene                                                            | - 1.3 |
| NR_033423.1    | LOC1720     | Dihydrofolate reductase pseudogene                                                      | - 1.3 |
| NM_003521.2    | HIST1H2BM   | Histone cluster 1, h2bm                                                                 | - 1.3 |
| NM_001530.3    | HIF1A       | Hypoxia inducible factor 1, alpha subunit (basic helix-loop-helix transcription factor) | - 1.3 |
| NM_002417.4    | MKI67       | Antigen identified by monoclonal antibody Ki-67                                         | - 1.2 |
| NM_020406.2    | CD177       | CD177 molecule                                                                          | - 1.2 |
| NM_001039841.1 | ARHGAP11B   | Rho gtpase activating protein 11B                                                       | - 1.2 |
| NM_001004690.1 | OR2M5       | Olfactory receptor, family 2, subfamily M, member 5                                     | - 1.2 |
| NM_052966.3    | FAM129A     | Family with sequence similarity 129, member A                                           | - 1.2 |
| NM_001067.3    | TOP2A       | Topoisomerase (DNA) II alpha 170kda                                                     | - 1.2 |
| NM_021018.2    | HIST1H3F    | Histone cluster 1, h3f                                                                  | - 1.2 |
| NM_182707.2    | PSG8        | Pregnancy specific beta-1-glycoprotein 8                                                | - 1.2 |
| NM_003535.2    | HIST1H3J    | Histone cluster 1, h3j                                                                  | - 1.2 |
| NM_004566.3    | PFKFB3      | 6-phosphofructo-2-kinase/fructose-2,6-biphosphatase 3                                   | - 1.2 |
| NM_016448.2    | DTL         | Denticleless E3 ubiquitin protein ligase homolog (Drosophila)                           | - 1.2 |
| NG_001019.5    | IGHM        | Immunoglobulin heavy constant mu                                                        | - 1.2 |
| NR_002907.2    | SNORA73A    | Small nucleolar RNA, H/ACA box 73A                                                      | - 1.2 |
| NM_017813.4    | IMPAD1      | Inositol monophosphatase domain containing 1                                            | - 1.1 |
| NM_021062.2    | HIST1H2BB   | Histone cluster 1, h2bb                                                                 | - 1.1 |
| NM_003540.3    | HIST1H4F    | Histone cluster 1, h4f                                                                  | - 1.1 |
| NM_017548.4    | CDV3        | CDV3 homolog (mouse)                                                                    | - 1.1 |
| NM_000045.3    | ARG1        | Arginase 1                                                                              | - 1.1 |
| NR_026823.1    | FAM138D     | Family with sequence similarity 138, member D                                           | - 1.1 |
| NM_015295.2    | SMCHD1      | Structural maintenance of chromosomes flexible hinge domain containing 1                | - 1.1 |
| NM_003524.2    | HIST1H2BH   | Histone cluster 1, h2bh                                                                 | - 1.1 |
| NR_003302.1    | SNORD115-10 | Small nucleolar RNA, C/D box 115-10                                                     | - 1.1 |
| NM_006418.4    | OLFM4       | Olfactomedin 4                                                                          | - 1.1 |
| NM_003539.3    | HIST1H4D    | Histone cluster 1, h4d                                                                  | - 1.1 |
| NM_003546.2    | HIST1H4L    | Histone cluster 1, h4l                                                                  | - 1.1 |
| NM_014791.3    | MELK        | Maternal embryonic leucine zipper kinase                                                | - 1.1 |
| NG_000834.1    | IGKC        | Immunoglobulin kappa constant                                                           | - 1.1 |
| NM_000715.3    | C4BPA       | Complement component 4 binding protein, alpha                                           | - 1.1 |
| NM_003509.2    | HIST1H2AI   | Histone cluster 1, h2ai                                                                 | - 1.1 |
| NM_003511.2    | HIST1H2AL   | Histone cluster 1, h2al                                                                 | - 1.1 |

|             |         |                                                                                  |       |
|-------------|---------|----------------------------------------------------------------------------------|-------|
| NR_003137.2 | RNU4-2  | RNA, U4 small nuclear 2                                                          | - 1.1 |
| NR_002937.2 | IGBP1P1 | Immunoglobulin (CD79A) binding protein 1 pseudogene 1                            | - 1.0 |
| NM_001274.5 | CHEK1   | Checkpoint kinase 1                                                              | - 1.0 |
| NM_016836.3 | RBMS1   | RNA binding motif, single stranded interacting protein 1                         | - 1.0 |
| NM_005645.3 | TAF13   | TAF13 RNA polymerase II, TATA box binding protein (TBP)-associated factor, 18kda | - 1.0 |
